# Supplementary material
Source: Springer Nature journal article supplement (https://www.springermedizin.de/resource/supplementary/12957_2013_1714_MOESM7_ESM.pdf/9563310)

Fig2. C)

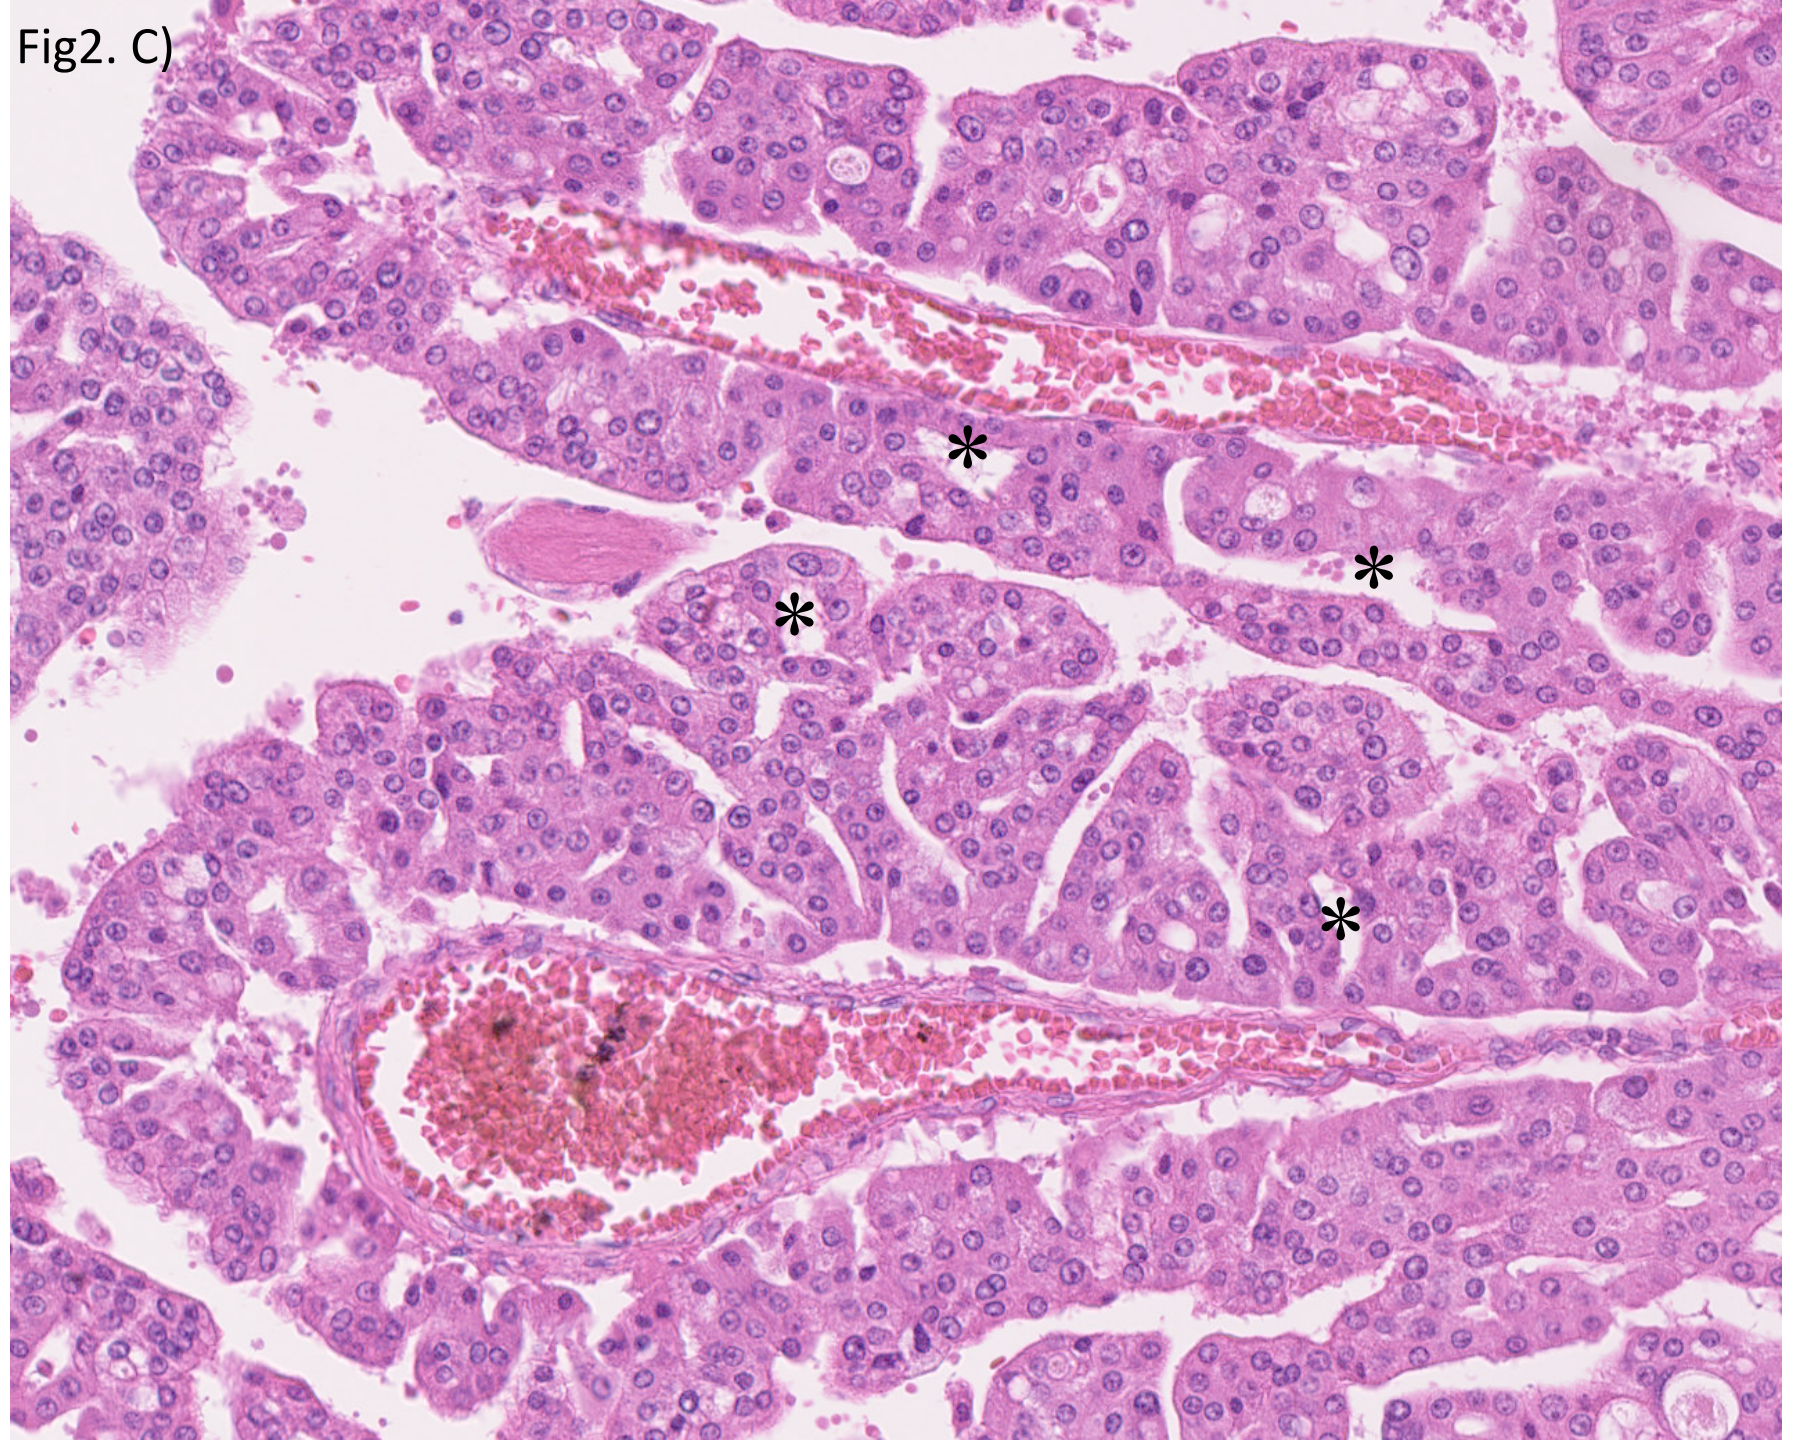

Supplement: MOESM7 [file 9563310]
